# Supplementary material
Source: ML conference proceedings conference paper supplement (https://openreview.net/forum?id=b1ITgc4J4M)

# ReFine

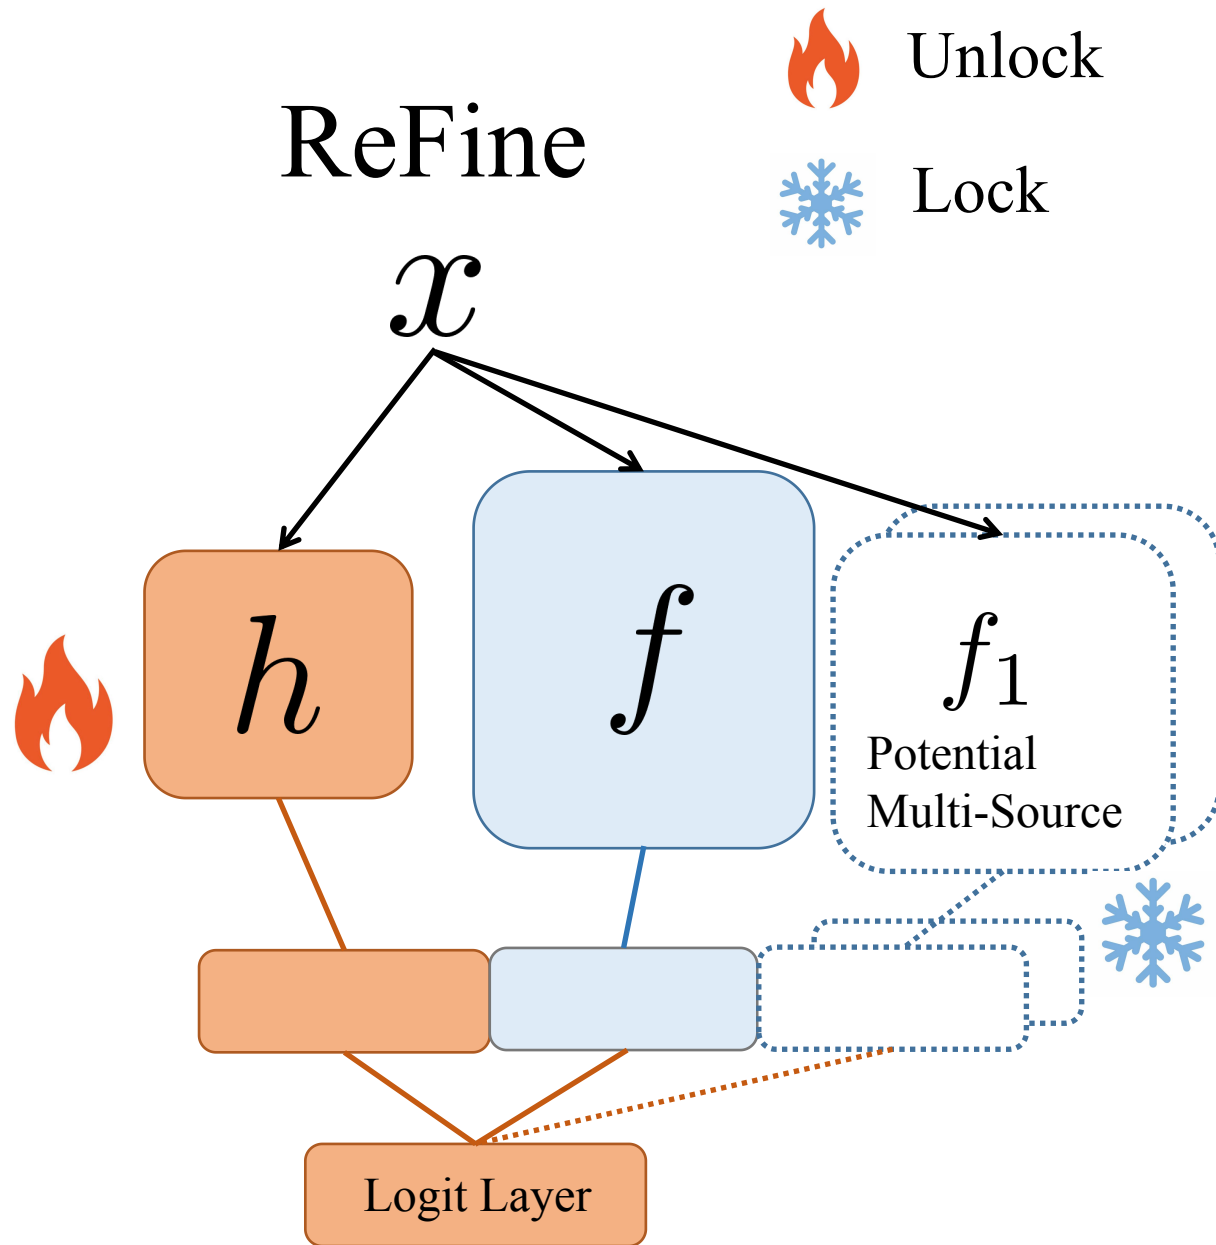

# Adapter

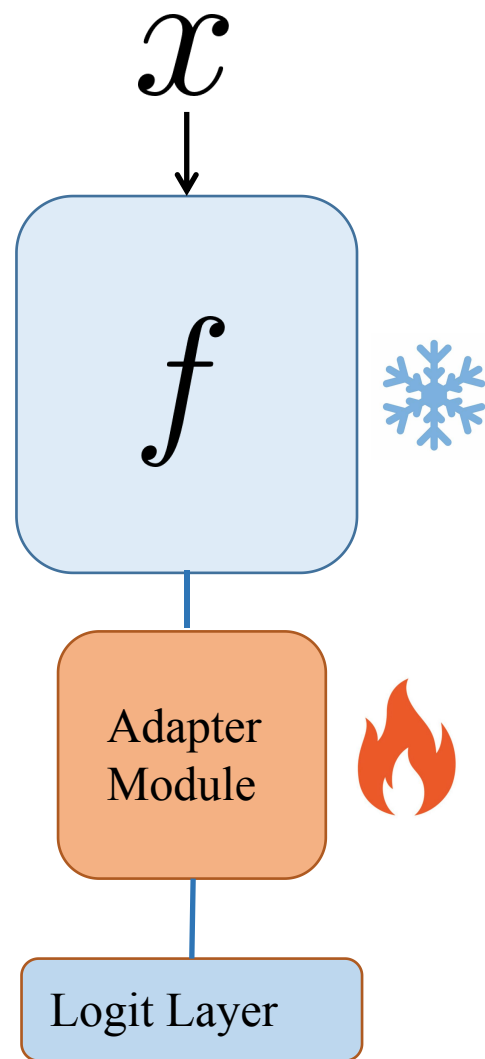

# LinearProb

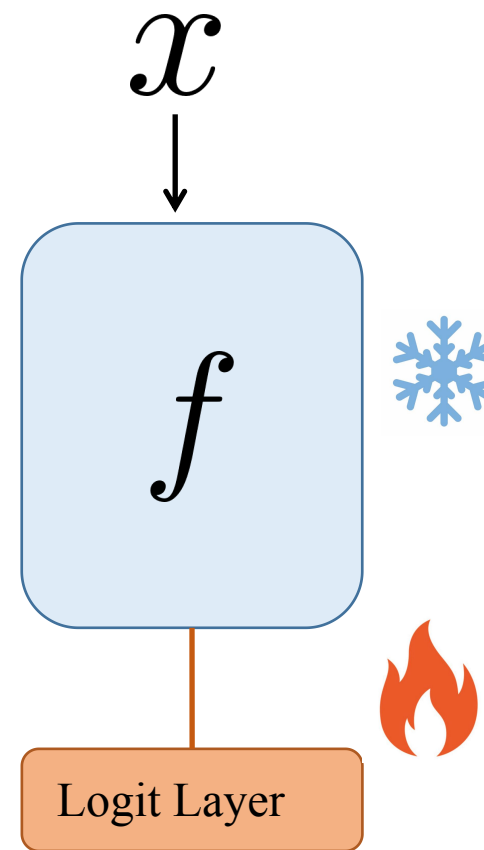

Supplement: supplementary_material [file teaser.pdf › ReFine-residual-feature-integration-main/teaser.pdf]
